# Supplementary material for: Synergistic amorphous carbon-coated VS4/VOx nanosheets with rich interfaces endow aqueous zinc-ion batteries with high performance
Source: Royal Society of Chemistry journal article supplement (doi:10.1039/d2ce01467j), 2023-01-01
Supplement: d2ce01467j1.pdf [file d2ce01467j1.pdf]

## Synergistic amorphous carbon coated VS<sub>4</sub>/VO<sub>x</sub> nanosheets with rich interfaces endow high performance of aqueous zinc-ion batteries

Juan Xu<sup>1\*</sup>, Haibin Guo<sup>2</sup>

<sup>1</sup>School of Electric Power, North China University of Water Resources and Electric Power, Zhengzhou 450003, P. R. China

<sup>2</sup>Office of Academic Affairs, North China University of Water Resources and Electric Power, Zhengzhou 450003, P. R. China

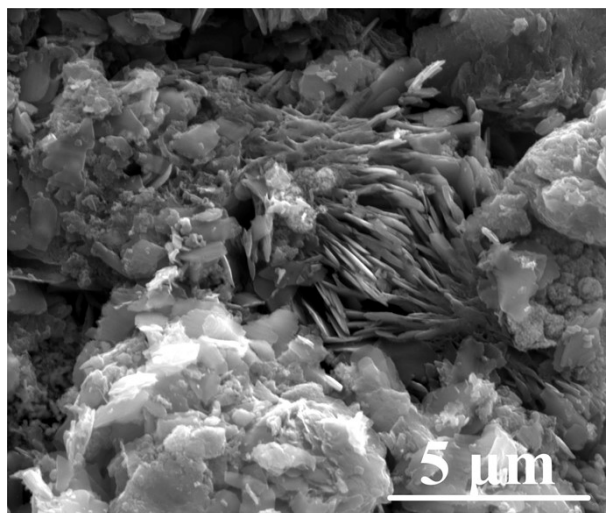

**Fig. S1** The morphology of VS<sub>4</sub>/VO<sub>2</sub> nanosheets.

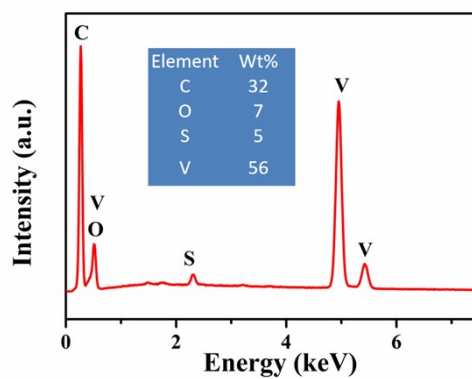

**Fig. S2** The quantification table for the C, O, S and V elements.

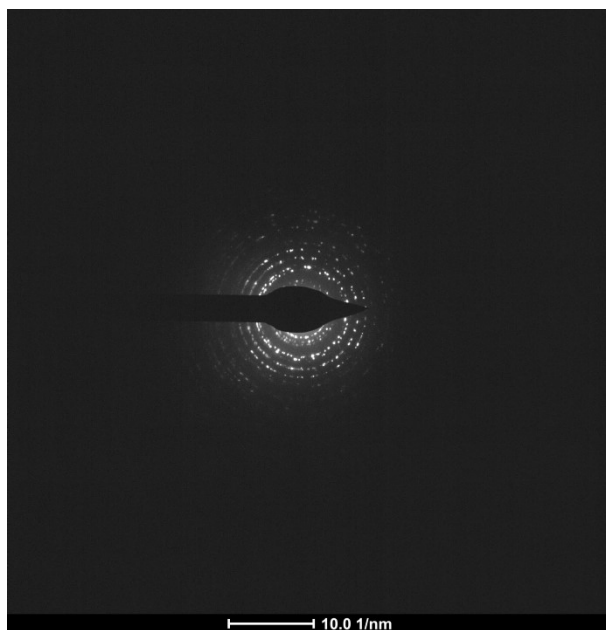

**Fig. S3** The selected area electron diffraction (SAED) pattern of  $\text{VS}_4/\text{VO}_x@\text{C}$ .

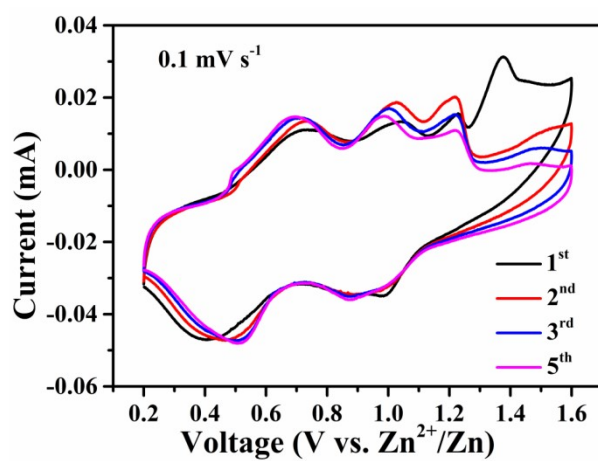

**Fig. S4** (a, b) The first fifth cycle CV curves of  $\text{VS}_4/\text{VO}_x@\text{C}$  electrode.
